# Supplementary material for: The study of the characteristics of the secondary flowering of Cerasus subhirtella ‘Autumnalis’
Source: PeerJ. 2023 Mar 6;11:e14655. doi: 10.7717/peerj.14655 (PMC9997188; doi:10.7717/peerj.14655)
Supplement: Supplemental Information 2 [file peerj-11-14655-s002.xls]

## Sheet: 原始数据
Well	Item	Reporter	S_Name	S_Type	Ct	Mean Ct	StdDev Ct	Target
A10	4	SYBR GREEN	DLY-01	Unknown Sample	20.38	20.14	0.216333	RSP3
A11	4	SYBR GREEN	DLY-01	Unknown Sample	19.96	20.14	0.216333	RSP3
A12	4	SYBR GREEN	DLY-01	Unknown Sample	20.08	20.14	0.216333	RSP3
B10	4	SYBR GREEN	DLY-02	Unknown Sample	21.16	21.3567	0.200083	RSP3
B11	4	SYBR GREEN	DLY-02	Unknown Sample	21.35	21.3567	0.200083	RSP3
B12	4	SYBR GREEN	DLY-02	Unknown Sample	21.56	21.3567	0.200083	RSP3
C10	4	SYBR GREEN	DLY-03	Unknown Sample	19.28	19.0867	0.172143	RSP3
C11	4	SYBR GREEN	DLY-03	Unknown Sample	18.95	19.0867	0.172143	RSP3
C12	4	SYBR GREEN	DLY-03	Unknown Sample	19.03	19.0867	0.172143	RSP3
D10	4	SYBR GREEN	DLY-04	Unknown Sample	19.07	19.16	0.0793725	RSP3
D11	4	SYBR GREEN	DLY-04	Unknown Sample	19.22	19.16	0.0793725	RSP3
D12	4	SYBR GREEN	DLY-04	Unknown Sample	19.19	19.16	0.0793725	RSP3
E10	4	SYBR GREEN	DLY-05	Unknown Sample	20.12	20.3167	0.282194	RSP3
E11	4	SYBR GREEN	DLY-05	Unknown Sample	20.64	20.3167	0.282194	RSP3
E12	4	SYBR GREEN	DLY-05	Unknown Sample	20.19	20.3167	0.282194	RSP3
F10	4	SYBR GREEN	DLY-06	Unknown Sample	20.23	20.1967	0.0305505	RSP3
F11	4	SYBR GREEN	DLY-06	Unknown Sample	20.17	20.1967	0.0305505	RSP3
F12	4	SYBR GREEN	DLY-06	Unknown Sample	20.19	20.1967	0.0305505	RSP3
G10	4	SYBR GREEN	DLY-07	Unknown Sample	20.4	20.5333	0.189297	RSP3
G11	4	SYBR GREEN	DLY-07	Unknown Sample	20.45	20.5333	0.189297	RSP3
G12	4	SYBR GREEN	DLY-07	Unknown Sample	20.75	20.5333	0.189297	RSP3
H10	4	SYBR GREEN	DLY-08	Unknown Sample	20.32	20.2667	0.0472582	RSP3
H11	4	SYBR GREEN	DLY-08	Unknown Sample	20.23	20.2667	0.0472582	RSP3
H12	4	SYBR GREEN	DLY-08	Unknown Sample	20.25	20.2667	0.0472582	RSP3
A1	1	SYBR GREEN	DLY-01	Unknown Sample	17.99	17.83	0.176918	DAM4
A2	1	SYBR GREEN	DLY-01	Unknown Sample	17.86	17.83	0.176918	DAM4
A3	1	SYBR GREEN	DLY-01	Unknown Sample	17.64	17.83	0.176918	DAM4
B1	1	SYBR GREEN	DLY-02	Unknown Sample	18.65	18.6667	0.0288675	DAM4
B2	1	SYBR GREEN	DLY-02	Unknown Sample	18.7	18.6667	0.0288675	DAM4
B3	1	SYBR GREEN	DLY-02	Unknown Sample	18.65	18.6667	0.0288675	DAM4
C1	1	SYBR GREEN	DLY-03	Unknown Sample	16.38	16.4867	0.12897	DAM4
C2	1	SYBR GREEN	DLY-03	Unknown Sample	16.45	16.4867	0.12897	DAM4
C3	1	SYBR GREEN	DLY-03	Unknown Sample	16.63	16.4867	0.12897	DAM4
D1	1	SYBR GREEN	DLY-04	Unknown Sample	22.12	22.02	0.117898	DAM4
D2	1	SYBR GREEN	DLY-04	Unknown Sample	22.05	22.02	0.117898	DAM4
D3	1	SYBR GREEN	DLY-04	Unknown Sample	21.89	22.02	0.117898	DAM4
E1	1	SYBR GREEN	DLY-05	Unknown Sample	19.87	19.8333	0.0472582	DAM4
E2	1	SYBR GREEN	DLY-05	Unknown Sample	19.78	19.8333	0.0472582	DAM4
E3	1	SYBR GREEN	DLY-05	Unknown Sample	19.85	19.8333	0.0472582	DAM4
F1	1	SYBR GREEN	DLY-06	Unknown Sample	20	19.86	0.122882	DAM4
F2	1	SYBR GREEN	DLY-06	Unknown Sample	19.81	19.86	0.122882	DAM4
F3	1	SYBR GREEN	DLY-06	Unknown Sample	19.77	19.86	0.122882	DAM4
G1	1	SYBR GREEN	DLY-07	Unknown Sample	16.19	16.1233	0.0585947	DAM4
G2	1	SYBR GREEN	DLY-07	Unknown Sample	16.08	16.1233	0.0585947	DAM4
G3	1	SYBR GREEN	DLY-07	Unknown Sample	16.1	16.1233	0.0585947	DAM4
H1	1	SYBR GREEN	DLY-08	Unknown Sample	24.97	24.9467	0.0404145	DAM4
H2	1	SYBR GREEN	DLY-08	Unknown Sample	24.97	24.9467	0.0404145	DAM4
H3	1	SYBR GREEN	DLY-08	Unknown Sample	24.9	24.9467	0.0404145	DAM4
A4	2	SYBR GREEN	DLY-01	Unknown Sample	23.63	23.8933	0.247049	DAM5
A5	2	SYBR GREEN	DLY-01	Unknown Sample	24.12	23.8933	0.247049	DAM5
A6	2	SYBR GREEN	DLY-01	Unknown Sample	23.93	23.8933	0.247049	DAM5
B4	2	SYBR GREEN	DLY-02	Unknown Sample	24.43	24.27	0.196977	DAM5
B5	2	SYBR GREEN	DLY-02	Unknown Sample	24.33	24.27	0.196977	DAM5
B6	2	SYBR GREEN	DLY-02	Unknown Sample	24.05	24.27	0.196977	DAM5
C4	2	SYBR GREEN	DLY-03	Unknown Sample	22.04	22.17	0.191572	DAM5
C5	2	SYBR GREEN	DLY-03	Unknown Sample	22.39	22.17	0.191572	DAM5
C6	2	SYBR GREEN	DLY-03	Unknown Sample	22.08	22.17	0.191572	DAM5
D4	2	SYBR GREEN	DLY-04	Unknown Sample	28.69	28.7667	0.215484	DAM5
D5	2	SYBR GREEN	DLY-04	Unknown Sample	28.6	28.7667	0.215484	DAM5
D6	2	SYBR GREEN	DLY-04	Unknown Sample	29.01	28.7667	0.215484	DAM5
E4	2	SYBR GREEN	DLY-05	Unknown Sample	30.6	30.7367	0.236714	DAM5
E5	2	SYBR GREEN	DLY-05	Unknown Sample	31.01	30.7367	0.236714	DAM5
E6	2	SYBR GREEN	DLY-05	Unknown Sample	30.6	30.7367	0.236714	DAM5
F4	2	SYBR GREEN	DLY-06	Unknown Sample	29.53	29.6367	0.122202	DAM5
F5	2	SYBR GREEN	DLY-06	Unknown Sample	29.61	29.6367	0.122202	DAM5
F6	2	SYBR GREEN	DLY-06	Unknown Sample	29.77	29.6367	0.122202	DAM5
G4	2	SYBR GREEN	DLY-07	Unknown Sample	25.13	25.35	0.291033	DAM5
G5	2	SYBR GREEN	DLY-07	Unknown Sample	25.68	25.35	0.291033	DAM5
G6	2	SYBR GREEN	DLY-07	Unknown Sample	25.24	25.35	0.291033	DAM5
H4	2	SYBR GREEN	DLY-08	Unknown Sample	34.13	34.39	0.282135	DAM5
H5	2	SYBR GREEN	DLY-08	Unknown Sample	34.69	34.39	0.282135	DAM5
H6	2	SYBR GREEN	DLY-08	Unknown Sample	34.35	34.39	0.282135	DAM5
A7	3	SYBR GREEN	DLY-01	Unknown Sample	23.01	22.7533	0.231589	DAM6
A8	3	SYBR GREEN	DLY-01	Unknown Sample	22.69	22.7533	0.231589	DAM6
A9	3	SYBR GREEN	DLY-01	Unknown Sample	22.56	22.7533	0.231589	DAM6
B7	3	SYBR GREEN	DLY-02	Unknown Sample	23.77	23.8767	0.136137	DAM6
B8	3	SYBR GREEN	DLY-02	Unknown Sample	23.83	23.8767	0.136137	DAM6
B9	3	SYBR GREEN	DLY-02	Unknown Sample	24.03	23.8767	0.136137	DAM6
C7	3	SYBR GREEN	DLY-03	Unknown Sample	21.38	21.27	0.0984886	DAM6
C8	3	SYBR GREEN	DLY-03	Unknown Sample	21.24	21.27	0.0984886	DAM6
C9	3	SYBR GREEN	DLY-03	Unknown Sample	21.19	21.27	0.0984886	DAM6
D7	3	SYBR GREEN	DLY-04	Unknown Sample	26.11	26.0533	0.115902	DAM6
D8	3	SYBR GREEN	DLY-04	Unknown Sample	26.13	26.0533	0.115902	DAM6
D9	3	SYBR GREEN	DLY-04	Unknown Sample	25.92	26.0533	0.115902	DAM6
E7	3	SYBR GREEN	DLY-05	Unknown Sample	24.06	24.0033	0.0602771	DAM6
E8	3	SYBR GREEN	DLY-05	Unknown Sample	23.94	24.0033	0.0602771	DAM6
E9	3	SYBR GREEN	DLY-05	Unknown Sample	24.01	24.0033	0.0602771	DAM6
F7	3	SYBR GREEN	DLY-06	Unknown Sample	23.49	23.42	0.213776	DAM6
F8	3	SYBR GREEN	DLY-06	Unknown Sample	23.59	23.42	0.213776	DAM6
F9	3	SYBR GREEN	DLY-06	Unknown Sample	23.18	23.42	0.213776	DAM6
G7	3	SYBR GREEN	DLY-07	Unknown Sample	21.11	21.1	0.01	DAM6
G8	3	SYBR GREEN	DLY-07	Unknown Sample	21.09	21.1	0.01	DAM6
G9	3	SYBR GREEN	DLY-07	Unknown Sample	21.1	21.1	0.01	DAM6
H7	3	SYBR GREEN	DLY-08	Unknown Sample	27.31	27.2633	0.155349	DAM6
H8	3	SYBR GREEN	DLY-08	Unknown Sample	27.39	27.2633	0.155349	DAM6
H9	3	SYBR GREEN	DLY-08	Unknown Sample	27.09	27.2633	0.155349	DAM6

## Sheet: 数据处理
Name	S_Name	Target	Ct	Reference CT	⊿Ct	contrast⊿Ct Mean	⊿⊿Ct	2-⊿⊿Ct
①CA1.10	DLY-01	RSP3	20.38			Take ①CA1.10 as control
①CA1.10	DLY-01	RSP3	19.96
①CA1.10	DLY-01	RSP3	20.08
②CA1.25	DLY-02	RSP3	21.16
②CA1.25	DLY-02	RSP3	21.35
②CA1.25	DLY-02	RSP3	21.56
④CA2.26	DLY-04	RSP3	19.07
④CA2.26	DLY-04	RSP3	19.22
④CA2.26	DLY-04	RSP3	19.19
⑤CS1.10	DLY-05	RSP3	20.12
⑤CS1.10	DLY-05	RSP3	20.64
⑤CS1.10	DLY-05	RSP3	20.19
⑥CS1.25	DLY-06	RSP3	20.23
⑥CS1.25	DLY-06	RSP3	20.17
⑥CS1.25	DLY-06	RSP3	20.19
⑧CS2.26	DLY-08	RSP3	20.32
⑧CS2.26	DLY-08	RSP3	20.23
⑧CS2.26	DLY-08	RSP3	20.25
①CA1.10	DLY-01	DAM4	17.99	20.38	-2.39	-2.31	-0.08	1.05702
①CA1.10	DLY-01	DAM4	17.86	19.96	-2.1	-2.31	0.21	0.864537
①CA1.10	DLY-01	DAM4	17.64	20.08	-2.44	-2.31	-0.13	1.09429
②CA1.25	DLY-02	DAM4	18.65	21.16	-2.51	-2.31	-0.2	1.1487
②CA1.25	DLY-02	DAM4	18.7	21.35	-2.65	-2.31	-0.34	1.26576
②CA1.25	DLY-02	DAM4	18.65	21.56	-2.91	-2.31	-0.6	1.51572
③CA2.10	DLY-03	DAM4	16.38	19.28	-2.9	-2.31	-0.59	1.50525
③CA2.10	DLY-03	DAM4	16.45	18.95	-2.5	-2.31	-0.19	1.14076
③CA2.10	DLY-03	DAM4	16.63	19.03	-2.4	-2.31	-0.09	1.06437
④CA2.26	DLY-04	DAM4	22.12	19.07	3.05	-2.31	5.36	0.0243489
④CA2.26	DLY-04	DAM4	22.05	19.22	2.83	-2.31	5.14	0.02836
④CA2.26	DLY-04	DAM4	21.89	19.19	2.7	-2.31	5.01	0.0310341
⑤CS1.10	DLY-05	DAM4	19.87	20.12	-0.25	-2.31	2.06	0.239816
⑤CS1.10	DLY-05	DAM4	19.78	20.64	-0.86	-2.31	1.45	0.366021
⑤CS1.10	DLY-05	DAM4	19.85	20.19	-0.34	-2.31	1.97	0.255253
⑥CS1.25	DLY-06	DAM4	20	20.23	-0.23	-2.31	2.08	0.236514
⑥CS1.25	DLY-06	DAM4	19.81	20.17	-0.36	-2.31	1.95	0.258816
⑥CS1.25	DLY-06	DAM4	19.77	20.19	-0.42	-2.31	1.89	0.269807
⑧CS2.26	DLY-08	DAM4	24.97	20.32	4.65	-2.31	6.96	0.00803214
⑧CS2.26	DLY-08	DAM4	24.97	20.23	4.74	-2.31	7.05	0.00754638
⑧CS2.26	DLY-08	DAM4	24.9	20.25	4.65	-2.31	6.96	0.00803214
①CA1.10	DLY-01	DAM5	23.63	20.38	3.25	3.75333	-0.503333	1.41748
①CA1.10	DLY-01	DAM5	24.12	19.96	4.16	3.75333	0.406667	0.754364
①CA1.10	DLY-01	DAM5	23.93	20.08	3.85	3.75333	0.0966667	0.935191
②CA1.25	DLY-02	DAM5	24.43	21.16	3.27	3.75333	-0.483333	1.39797
②CA1.25	DLY-02	DAM5	24.33	21.35	2.98	3.75333	-0.773333	1.70921
②CA1.25	DLY-02	DAM5	24.05	21.56	2.49	3.75333	-1.26333	2.4005
③CA2.10	DLY-03	DAM5	22.04	19.28	2.76	3.75333	-0.993333	1.99078
③CA2.10	DLY-03	DAM5	22.39	18.95	3.44	3.75333	-0.313333	1.24258
③CA2.10	DLY-03	DAM5	22.08	19.03	3.05	3.75333	-0.703333	1.62826
④CA2.26	DLY-04	DAM5	28.69	19.07	9.62	3.75333	5.86667	0.0171379
④CA2.26	DLY-04	DAM5	28.6	19.22	9.38	3.75333	5.62667	0.0202397
④CA2.26	DLY-04	DAM5	29.01	19.19	9.82	3.75333	6.06667	0.0149194
⑤CS1.10	DLY-05	DAM5	30.6	20.12	10.48	3.75333	6.72667	0.00944216
⑤CS1.10	DLY-05	DAM5	31.01	20.64	10.37	3.75333	6.61667	0.0101903
⑤CS1.10	DLY-05	DAM5	30.6	20.19	10.41	3.75333	6.65667	0.0099116
⑥CS1.25	DLY-06	DAM5	29.53	20.23	9.3	3.75333	5.54667	0.0213938
⑥CS1.25	DLY-06	DAM5	29.61	20.17	9.44	3.75333	5.68667	0.0194152
⑥CS1.25	DLY-06	DAM5	29.77	20.19	9.58	3.75333	5.82667	0.0176197
⑧CS2.26	DLY-08	DAM5	34.13	20.32	13.81	3.75333	10.0567	0.000938948
⑧CS2.26	DLY-08	DAM5	34.69	20.23	14.46	3.75333	10.7067	0.000598373
⑧CS2.26	DLY-08	DAM5	34.35	20.25	14.1	3.75333	10.3467	0.000767968
①CA1.10	DLY-01	DAM6	23.01	20.38	2.63	2.61333	0.0166667	0.988514
①CA1.10	DLY-01	DAM6	22.69	19.96	2.73	2.61333	0.116667	0.922316
①CA1.10	DLY-01	DAM6	22.56	20.08	2.48	2.61333	-0.133333	1.09682
②CA1.25	DLY-02	DAM6	23.77	21.16	2.61	2.61333	-0.00333333	1.00231
②CA1.25	DLY-02	DAM6	23.83	21.35	2.48	2.61333	-0.133333	1.09682
②CA1.25	DLY-02	DAM6	24.03	21.56	2.47	2.61333	-0.143333	1.10445
③CA2.10	DLY-03	DAM6	21.38	19.28	2.1	2.61333	-0.513333	1.42734
③CA2.10	DLY-03	DAM6	21.24	18.95	2.29	2.61333	-0.323333	1.25122
③CA2.10	DLY-03	DAM6	21.19	19.03	2.16	2.61333	-0.453333	1.3692
④CA2.26	DLY-04	DAM6	26.11	19.07	7.04	2.61333	4.42667	0.0464987
④CA2.26	DLY-04	DAM6	26.13	19.22	6.91	2.61333	4.29667	0.0508832
④CA2.26	DLY-04	DAM6	25.92	19.19	6.73	2.61333	4.11667	0.0576448
⑤CS1.10	DLY-05	DAM6	24.06	20.12	3.94	2.61333	1.32667	0.398688
⑤CS1.10	DLY-05	DAM6	23.94	20.64	3.3	2.61333	0.686667	0.621288
⑤CS1.10	DLY-05	DAM6	24.01	20.19	3.82	2.61333	1.20667	0.433269
⑥CS1.25	DLY-06	DAM6	23.49	20.23	3.26	2.61333	0.646667	0.638754
⑥CS1.25	DLY-06	DAM6	23.59	20.17	3.42	2.61333	0.806667	0.571701
⑥CS1.25	DLY-06	DAM6	23.18	20.19	2.99	2.61333	0.376667	0.770215
⑧CS2.26	DLY-08	DAM6	27.31	20.32	6.99	2.61333	4.37667	0.0481384
⑧CS2.26	DLY-08	DAM6	27.39	20.23	7.16	2.61333	4.54667	0.0427875
⑧CS2.26	DLY-08	DAM6	27.09	20.25	6.84	2.61333	4.22667	0.0534129
