# Supplementary material for: The study of the characteristics of the secondary flowering of Cerasus subhirtella ‘Autumnalis’
Source: PeerJ. 2023 Mar 6;11:e14655. doi: 10.7717/peerj.14655 (PMC9997188; doi:10.7717/peerj.14655)
Supplement: Supplemental Information 3 [file peerj-11-14655-s003.xlsx]

## Sheet: DAM4
variety	date	ct
1	1	21.12
1	1	21.21
1	1	21.17		ct
1	2	20.31			date	Number of cases	A subset of Alpha = 0.05
1	2	20.17					1	2	3	4	5	6	7	8	9	10	11	12	13	14	15	16	17	18
1	2	20.2		Duncan a	16	3	16.42
1	3	24.04			14	3		17.4533
1	3	24.03			18	3			17.6333
1	3	24.05			9	3				17.83
1	4	20.06			17	3					18.24
1	4	20.1			5	3					18.2533
1	4	20.04			10	3						18.6667
1	5	18.28			8	3							19.17
1	5	18.25			6	3							19.2133
1	5	18.23			7	3								19.6
1	6	19.26			19	3								19.6833
1	6	19.2			20	3									19.8333
1	6	19.18			21	3									19.86
1	7	19.64			4	3										20.0667
1	7	19.59			2	3											20.2267
1	7	19.57			12	3												20.9633
1	8	19.15			1	3													21.1667
1	8	19.15			15	3														21.62
1	8	19.21			11	3															22.02
1	9	17.99			3	3																24.04
1	9	17.86			22	3																	24.9467
1	9	17.64			13	3																		28.5533
1	10	18.65			significance		1	1	1	1	0.851	1	0.542	0.244	0.707	1	1	1	1	1	1	1	1	1
1	10	18.7		The average value of each group in the homogeneous subset will be displayed.
1	10	18.65		A Sample size using harmonic mean = 3.000.
1	11	22.12
1	11	22.05
1	11	21.89
2	12	21.01
2	12	20.98
2	12	20.9
2	13	28.59
2	13	28.55
2	13	28.52
2	14	17.52
2	14	17.47
2	14	17.37
2	15	21.51
2	15	21.53
2	15	21.82
2	16	16.47
2	16	16.37
2	16	16.42
2	17	18.17
2	17	18.41
2	17	18.14
2	18	17.75
2	18	17.67
2	18	17.48
2	19	19.65
2	19	19.73
2	19	19.67
2	20	19.87
2	20	19.78
2	20	19.85
2	21	20
2	21	19.81
2	21	19.77
2	22	24.97
2	22	24.97
2	22	24.9

## Sheet: DAM5
variety	date	ct
1	1	22.42
1	1	22.37		ct
1	1	22.62			date	Number of cases	A subset of Alpha = 0.05
1	2	22.1					1	2	3	4	5	6	7	8	9	10	11	12	13	14	15	16	17
1	2	21.59		Duncan a	14	3	19.85
1	2	21.91			16	3		20.1633
1	3	25.56			5	3		20.2733
1	3	25.52			4	3			21.4767
1	3	25.71			2	3				21.8667
1	4	21.5			6	3				21.9833
1	4	21.6			8	3					22.45
1	4	21.33			1	3					22.47
1	5	20.38			7	3					22.5467
1	5	20.19			17	3						22.83
1	5	20.25			9	3							23.8933
1	6	22.09			18	3								24.2667
1	6	21.97			10	3								24.27
1	6	21.89			15	3									24.6533
1	7	22.55			12	3										25.0067
1	7	22.38			3	3											25.5967
1	7	22.71			19	3												26.1367
1	8	22.45			11	3													28.7667
1	8	22.51			21	3														29.6367
1	8	22.39			20	3															30.7367
1	9	23.63			13	3																33.12
1	9	24.12			22	3																	34.39
1	9	23.93			significance		1	0.435	1	0.408	0.52	1	1	0.981	1	1	1	1	1	1	1	1	1
1	10	24.43		The average value of each group in the homogeneous subset will be displayed.
1	10	24.33		A Sample size using harmonic mean = 3.000.
1	10	24.05
1	11	28.69
1	11	28.6
1	11	29.01
2	12	25
2	12	24.95
2	12	25.07
2	13	33.14
2	13	33.19
2	13	33.03
2	14	19.71
2	14	20.05
2	14	19.79
2	15	24.59
2	15	24.83
2	15	24.54
2	16	19.98
2	16	20.28
2	16	20.23
2	17	22.63
2	17	22.98
2	17	22.88
2	18	24.17
2	18	24.23
2	18	24.4
2	19	25.92
2	19	26.35
2	19	26.14
2	20	30.6
2	20	31.01
2	20	30.6
2	21	29.53
2	21	29.61
2	21	29.77
2	22	34.13
2	22	34.69
2	22	34.35

## Sheet: DAM6
variety	date	ct
1	1	20.04
1	1	20.14		ct
1	1	19.93			date	Number of cases	A subset of Alpha = 0.05
1	2	19.78					1	2	3	4	5	6	7	8	9	10	11	12	13	14	15	16
1	2	19.61		Duncan a	14	3	19
1	2	19.49			16	3		19.2767
1	3	24.17			2	3			19.6267
1	3	24.43			1	3				20.0367
1	3	24.15			5	3					20.5367
1	4	21.07			4	3						21.0567
1	4	21.16			12	3							21.6367
1	4	20.94			18	3								22.35
1	5	20.73			6	3								22.3567
1	5	20.54			17	3								22.4667
1	5	20.34			9	3									22.7533
1	6	22.26			21	3										23.42
1	6	22.36			8	3										23.6733	23.6733
1	6	22.45			7	3											23.86	23.86
1	7	23.85			10	3											23.8767	23.8767
1	7	24.03			20	3												24.0033	24.0033
1	7	23.7			15	3													24.2167
1	8	23.91			19	3													24.2267
1	8	23.51			3	3													24.25
1	8	23.6			11	3														26.0533
1	9	23.01			22	3															27.2633
1	9	22.69			13	3																30.5033
1	9	22.56			significance		1	1	1	1	1	1	1	0.403	1	0.057	0.146	0.305	0.088	1	1	1
1	10	23.77		The average value of each group in the homogeneous subset will be displayed.
1	10	23.83		A Sample size using harmonic mean = 3.000.
1	10	24.03
1	11	26.11
1	11	26.13
1	11	25.92
2	12	21.53
2	12	21.47
2	12	21.91
2	13	30.57
2	13	30.4
2	13	30.54
2	14	19.15
2	14	18.92
2	14	18.93
2	15	24.37
2	15	24.27
2	15	24.01
2	16	19.36
2	16	19.43
2	16	19.04
2	17	22.44
2	17	22.47
2	17	22.49
2	18	22.46
2	18	22.42
2	18	22.17
2	19	24.23
2	19	24.38
2	19	24.07
2	20	24.06
2	20	23.94
2	20	24.01
2	21	23.49
2	21	23.59
2	21	23.18
2	22	27.31
2	22	27.39
2	22	27.09
